# Supplementary material
Source: MDPI journal article supplement (https://www.mdpi.com/1424-2818/14/10/838)
Supplement: s1 [file s1]

# Assessment

## context

**a01. Provide the name(s) of the assessors:** unanswered

**a02. Provide the name of the organism under assessment:** Dikerogammarus villosus

**a03. Define the area under assessment:** Parco Adda Sud

**a04. The Organism is:** alien to, and established within The Area's wild

**a05. This assessment is considering potential impacts within the following domains:** the environmental domain

## introduction

**a06. The probability for The Organism to be introduced into The Area's wild by natural means is:**

|           |              |           |                  |           |
|-----------|--------------|-----------|------------------|-----------|
| Weight: 1 | Answer: high | AValue: 1 | Confidence: high | CValue: 1 |
|-----------|--------------|-----------|------------------|-----------|

**a07. The probability for The Organism to be introduced into The Area's wild by unintentional human actions is:**

|           |              |           |                  |           |
|-----------|--------------|-----------|------------------|-----------|
| Weight: 1 | Answer: high | AValue: 1 | Confidence: high | CValue: 1 |
|-----------|--------------|-----------|------------------|-----------|

**a08. The probability for The Organism to be introduced into The Area's wild by intentional human actions is:**

|           |             |           |                  |           |
|-----------|-------------|-----------|------------------|-----------|
| Weight: 1 | Answer: low | AValue: 0 | Confidence: high | CValue: 1 |
|-----------|-------------|-----------|------------------|-----------|

## establishment

**a09. The Area provides ... climate for establishment of The Organism.**

|           |                 |           |                    |             |
|-----------|-----------------|-----------|--------------------|-------------|
| Weight: 1 | Answer: optimal | AValue: 1 | Confidence: medium | CValue: 0.5 |
|-----------|-----------------|-----------|--------------------|-------------|

**a10. The Area provides ... habitat for establishment of The Organism.**

|           |                 |           |                  |           |
|-----------|-----------------|-----------|------------------|-----------|
| Weight: 1 | Answer: optimal | AValue: 1 | Confidence: high | CValue: 1 |
|-----------|-----------------|-----------|------------------|-----------|

## spread

**a11. The Organism's capacity to disperse within The Area by natural means is:**

|           |              |              |                  |           |
|-----------|--------------|--------------|------------------|-----------|
| Weight: 1 | Answer: high | AValue: 0.75 | Confidence: high | CValue: 1 |
|-----------|--------------|--------------|------------------|-----------|

**a12. The Organism's frequency of dispersal within The Area by human actions is:**

|           |                |             |                  |           |
|-----------|----------------|-------------|------------------|-----------|
| Weight: 1 | Answer: medium | AValue: 0.5 | Confidence: high | CValue: 1 |
|-----------|----------------|-------------|------------------|-----------|

## environmental im.

**a13. The Organism has a(n) ... effect on native species, through predation, parasitism or herbivory:**

Weight: 1      Answer: low      AValue: 0      Confidence: high      CValue: 1

**a14. The Organism has a (...) effect on native species, through competition:**

Weight: 1      Answer: medium      AValue: 0.5      Confidence: high      CValue: 1

**a15. The Organism has a(n) (...) effect on native species, through interbreeding:**

Weight: 1      Answer: no / very low      AValue: 0      Confidence: high      CValue: 1

**a16. The Organism has a (...) effect on native species, by hosting pathogens or parasites that are harmful to them.**

Weight: 1      Answer: very low      AValue: 0      Confidence: unanswered      CValue: unanswered

**a17. The Organism has a (...) effect on ecosystem integrity, by affecting its abiotic properties.**

Weight: 1      Answer: low      AValue: 0      Confidence: high      CValue: 1

**a18. The Organism has a (...) effect on ecosystem integrity, by affecting its biotic properties.**

Weight: 1      Answer: low      AValue: 0      Confidence: unanswered      CValue: unanswered

## plant im.

**a19. The Organism has a(n) (...) effect on plant targets, through herbivory or parasitism.**

Weight: n/a      Answer: inapplicable      AValue: n/a      Confidence: unanswered      CValue: unanswered

**a20. The Organism has a(n) (...) effect on plant targets, through competition.**

Weight: n/a      Answer: inapplicable      AValue: n/a      Confidence: unanswered      CValue: unanswered

**a21. The Organism has a(n) (...) effect on plant targets, by interbreeding with related organisms or with the target itself.**

Weight: n/a      Answer: inapplicable      AValue: n/a      Confidence: unanswered      CValue: unanswered

**a22. The Organism has a (...) effect on plant targets, by affecting the cultivation system's integrity.**

Weight: n/a      Answer: unanswered      AValue: unanswered      Confidence: unanswered      CValue: unanswered

**a23. The Organism has a(n) (...) effect on plant targets, by hosting pathogens or parasites that are harmful to them:**

Weight: n/a      Answer: inapplicable      AValue: n/a      Confidence: unanswered      CValue: unanswered

## **animal im.**

**a24. The Organism has a(n) (...) effect on individual animal health or animal production, through predation or parasitism.**

Weight: 1      Answer: high      AValue: 0.75      Confidence: high      CValue: 1

**a25. The Organism has a (...) effect on individual animal health or animal production, by having properties that are hazardous upon contact.**

Weight: 1      Answer: very low      AValue: 0      Confidence: high      CValue: 1

**a26. The Organism has a(n) (...) effect on individual animal health or animal production, by hosting pathogens or parasites that are harmful to them.**

Weight: 1      Answer: very low      AValue: 0      Confidence: high      CValue: 1

## **human im.**

**a27. The Organism has a(n) (...) effect on human health, through parasitism.**

Weight: n/a      Answer: inapplicable      AValue: n/a      Confidence: unanswered      CValue: unanswered

**a28. The Organism has a (...) effect on human health, by having properties that are hazardous upon contact.**

Weight: n/a      Answer: unanswered      AValue: unanswered      Confidence: unanswered      CValue: unanswered

**a29. The Organism has a(n) (...) effect on the health of human targets, by hosting pathogens or parasites that are harmful to them.**

Weight: n/a      Answer: inapplicable      AValue: n/a      Confidence: unanswered      CValue: unanswered

## **other im.**

**a30. The Organism has a (...) effect on causing damage to infrastructure.**

Weight: 1      Answer: very low      AValue: 0      Confidence: high      CValue: 1

## **services**

**a31. The Organism has a (...) effect on provisioning services.**

Weight: None      Answer: neutral      AValue: 0.5      Confidence: high      CValue: 1

**a32. The Organism has a (...) effect on regulation and maintenance services.**

Weight: None      Answer: neutral      AValue: 0.5      Confidence: high      CValue: 1

**a33. The Organism has a (...) effect on cultural services.**

Weight: None      Answer: moderately negative      AValue: 0.25      Confidence: medium      CValue: 0.5

## climate

**a34. INTRODUCTION - Due to climate change, the risk for The Organism to overcome geographical barriers and -if applicable- subsequent barriers of captivity or cultivation will (...).**

|              |                             |              |                    |             |
|--------------|-----------------------------|--------------|--------------------|-------------|
| Weight: None | Answer: decrease moderately | AValue: 0.25 | Confidence: medium | CValue: 0.5 |
|--------------|-----------------------------|--------------|--------------------|-------------|

**a35. ESTABLISHMENT - Due to climate change, the likelihood for The Organism to overcome survival & reproduction barriers will (...).**

|              |                    |             |                    |             |
|--------------|--------------------|-------------|--------------------|-------------|
| Weight: None | Answer: not change | AValue: 0.5 | Confidence: medium | CValue: 0.5 |
|--------------|--------------------|-------------|--------------------|-------------|

**a36. SPREAD - Due to climate change, the risk of The Organism to overcome dispersal barriers & (new) environmental barriers within The Area will (...).**

|              |                    |             |                    |             |
|--------------|--------------------|-------------|--------------------|-------------|
| Weight: None | Answer: not change | AValue: 0.5 | Confidence: medium | CValue: 0.5 |
|--------------|--------------------|-------------|--------------------|-------------|

**a37. IMPACTS: ENVIRONMENTAL TARGETS - Due to climate change, the consequences of The Organism on wild animals and plants, habitats and ecosystems will (...).**

|              |                    |             |                    |             |
|--------------|--------------------|-------------|--------------------|-------------|
| Weight: None | Answer: not change | AValue: 0.5 | Confidence: medium | CValue: 0.5 |
|--------------|--------------------|-------------|--------------------|-------------|

**a38. IMPACTS: PLANT TARGETS - Due to climate change, the consequences of The Organism on cultivated plants (e.g. crops, pastures, horticultural stock) will (...).**

|              |                    |                    |                        |                    |
|--------------|--------------------|--------------------|------------------------|--------------------|
| Weight: None | Answer: unanswered | AValue: unanswered | Confidence: unanswered | CValue: unanswered |
|--------------|--------------------|--------------------|------------------------|--------------------|

**a39. IMPACTS: ANIMAL TARGETS - Due to climate change, the consequences of The Organism on domesticated animals (e.g. production animals, companion animals) will (...).**

|              |                    |                    |                        |                    |
|--------------|--------------------|--------------------|------------------------|--------------------|
| Weight: None | Answer: unanswered | AValue: unanswered | Confidence: unanswered | CValue: unanswered |
|--------------|--------------------|--------------------|------------------------|--------------------|

**a40. IMPACTS: HUMAN TARGETS - Due to climate change, the consequences of The Organism on humans will (...).**

|              |                    |                    |                        |                    |
|--------------|--------------------|--------------------|------------------------|--------------------|
| Weight: None | Answer: unanswered | AValue: unanswered | Confidence: unanswered | CValue: unanswered |
|--------------|--------------------|--------------------|------------------------|--------------------|

**a41. IMPACTS: OTHER TARGETS - Due to climate change, the consequences of The Organism on targets not considered in previous modules will (...).**

|              |                    |                    |                        |                    |
|--------------|--------------------|--------------------|------------------------|--------------------|
| Weight: None | Answer: unanswered | AValue: unanswered | Confidence: unanswered | CValue: unanswered |
|--------------|--------------------|--------------------|------------------------|--------------------|

# Summary

| Module                     | Score | Aggregation method | Weight | Confidence |
|----------------------------|-------|--------------------|--------|------------|
| introduction score         | 0.667 | arithmetic         | 1      | 1.0        |
| establishment score        | 1.0   | arithmetic         | 1      | 0.75       |
| spread score               | 0.625 | arithmetic         | 1      | 1.0        |
| environmental im.<br>score | 0.083 | arithmetic         | 1      | 0.667      |
| plant im. score            | n/a   | arithmetic         | 1      | n/a        |
| animal im. score           | 0.25  | arithmetic         | 1      | 1.0        |
| human im. score            | n/a   | arithmetic         | 1      | n/a        |
| other im. score            | 0.0   | arithmetic         | 1      | 1.0        |
|                            |       |                    |        |            |
| invasion                   | 0.747 | geometric          |        |            |
| impact                     | 0.250 | maximum            |        |            |
|                            |       |                    |        |            |
| overall risk score         | 0.187 |                    |        |            |
