# Supplementary material
Source: MDPI journal article supplement (https://www.mdpi.com/1424-2818/14/10/838)
Supplement: s1 [file s1]

## AS-ISK v2

| Taxon and Assessor details         |                                |
|------------------------------------|--------------------------------|
| Category                           | Invertebrates (freshwater)     |
| Taxon name                         | <i>Dikerogammarus villosus</i> |
| Common name                        | killer shrimp                  |
| Assessor                           | dp                             |
| Risk screening context             |                                |
| Reason and socio-economic benefits |                                |
| Risk assessment area               | Adda                           |
| Taxonomy                           |                                |
| Native range                       |                                |
| Introduced range                   |                                |
| URL                                |                                |

|                                                |      | Response                                                                                                                                                         | Justification (references and/or other information)                                                                                                                                                                                                                                                                                                                                                                                                                                                                                                                                                                                                                                                                                                                                                                                                                                                                                                                                                                                                                                                                                                                                                                                                                                                                                                                                                                                                                                                                                                                                                                                                                                                                                                                                                                 | Confidence |
|------------------------------------------------|------|------------------------------------------------------------------------------------------------------------------------------------------------------------------|---------------------------------------------------------------------------------------------------------------------------------------------------------------------------------------------------------------------------------------------------------------------------------------------------------------------------------------------------------------------------------------------------------------------------------------------------------------------------------------------------------------------------------------------------------------------------------------------------------------------------------------------------------------------------------------------------------------------------------------------------------------------------------------------------------------------------------------------------------------------------------------------------------------------------------------------------------------------------------------------------------------------------------------------------------------------------------------------------------------------------------------------------------------------------------------------------------------------------------------------------------------------------------------------------------------------------------------------------------------------------------------------------------------------------------------------------------------------------------------------------------------------------------------------------------------------------------------------------------------------------------------------------------------------------------------------------------------------------------------------------------------------------------------------------------------------|------------|
| A. Biogeography/Historical                     |      |                                                                                                                                                                  |                                                                                                                                                                                                                                                                                                                                                                                                                                                                                                                                                                                                                                                                                                                                                                                                                                                                                                                                                                                                                                                                                                                                                                                                                                                                                                                                                                                                                                                                                                                                                                                                                                                                                                                                                                                                                     |            |
| 1. Domestication/Cultivation                   |      |                                                                                                                                                                  |                                                                                                                                                                                                                                                                                                                                                                                                                                                                                                                                                                                                                                                                                                                                                                                                                                                                                                                                                                                                                                                                                                                                                                                                                                                                                                                                                                                                                                                                                                                                                                                                                                                                                                                                                                                                                     |            |
| 1                                              | 1.01 | Has the taxon been the subject of domestication (or cultivation) for at least 20 generations?                                                                    | No<br><br>D. villosus does not have any economic value or provide any social benefit. It is not used in environmental services<br><a href="https://www.cabi.org/isc/datasheet/108309#tomeansOfMovementAndDispersal">https://www.cabi.org/isc/datasheet/108309#tomeansOfMovementAndDispersal</a>                                                                                                                                                                                                                                                                                                                                                                                                                                                                                                                                                                                                                                                                                                                                                                                                                                                                                                                                                                                                                                                                                                                                                                                                                                                                                                                                                                                                                                                                                                                     | Very high  |
| 2                                              | 1.02 | Is the taxon harvested in the wild and likely to be sold or used in its live form?                                                                               | No<br><br>D. villosus does not have any economic value or provide any social benefit. It is not used in environmental services.                                                                                                                                                                                                                                                                                                                                                                                                                                                                                                                                                                                                                                                                                                                                                                                                                                                                                                                                                                                                                                                                                                                                                                                                                                                                                                                                                                                                                                                                                                                                                                                                                                                                                     | Very high  |
| 3                                              | 1.03 | Does the taxon have invasive races, varieties, sub-taxa or congeners?                                                                                            | Yes<br><br><a href="https://www.cabi.org/isc/search/index?q=dikerogammarus">https://www.cabi.org/isc/search/index?q=dikerogammarus</a>                                                                                                                                                                                                                                                                                                                                                                                                                                                                                                                                                                                                                                                                                                                                                                                                                                                                                                                                                                                                                                                                                                                                                                                                                                                                                                                                                                                                                                                                                                                                                                                                                                                                              | Very high  |
| 2. Climate, distribution and introduction risk |      |                                                                                                                                                                  |                                                                                                                                                                                                                                                                                                                                                                                                                                                                                                                                                                                                                                                                                                                                                                                                                                                                                                                                                                                                                                                                                                                                                                                                                                                                                                                                                                                                                                                                                                                                                                                                                                                                                                                                                                                                                     |            |
| 4                                              | 2.01 | How similar are the climatic conditions of the Risk Assessment (RA) area and the taxon's native range?                                                           | High<br><br>expert judgment                                                                                                                                                                                                                                                                                                                                                                                                                                                                                                                                                                                                                                                                                                                                                                                                                                                                                                                                                                                                                                                                                                                                                                                                                                                                                                                                                                                                                                                                                                                                                                                                                                                                                                                                                                                         | Medium     |
| 5                                              | 2.02 | What is the quality of the climate matching data?                                                                                                                | Medium<br><br>expert judgement                                                                                                                                                                                                                                                                                                                                                                                                                                                                                                                                                                                                                                                                                                                                                                                                                                                                                                                                                                                                                                                                                                                                                                                                                                                                                                                                                                                                                                                                                                                                                                                                                                                                                                                                                                                      | Medium     |
| 6                                              | 2.03 | Is the taxon already present outside of captivity in the RA area?                                                                                                | Not applicable<br><br>D. villosus does not have any economic value or provide any social benefit. It is not used in environmental services<br><a href="https://www.cabi.org/isc/datasheet/108309#tomeansOfMovementAndDispersal">https://www.cabi.org/isc/datasheet/108309#tomeansOfMovementAndDispersal</a>                                                                                                                                                                                                                                                                                                                                                                                                                                                                                                                                                                                                                                                                                                                                                                                                                                                                                                                                                                                                                                                                                                                                                                                                                                                                                                                                                                                                                                                                                                         | Very high  |
| 7                                              | 2.04 | How many potential vectors could the taxon use to enter in the RA area?                                                                                          | >1<br><br><a href="https://www.cabi.org/isc/datasheet/108309#tomeansOfMovementAndDispersal">https://www.cabi.org/isc/datasheet/108309#tomeansOfMovementAndDispersal</a> Natural dispersal of D. villosus occurs by active migration (Nesemann et al., 1995; Vaate et al., 2002; Jazdzewski and Konopacka, 2002; Josens et al., 2005). The speed of active D. villosus upstream range extension may reach up to 40 km/year, or approximately 100 m/day (Josens et al., 2005). Shipping has been identified as the primary vector for accidental introductions of D. villosus over large distances (e.g., Vaate et al., 2002; Jazdzewski and Konopacka, 2002; Dick, 2009). Intentional introductions of D. villosus, though possible, have not been reported. Nesemann H, Pöcki M, Wittmann K J, 1995. Distribution of epigean Malacostraca in the middle and upper Danube (Hungary, Austria, Germany). <i>Miscellanea Zoologica Hungarica</i> . 49-68. Vaate A bij de, Jazdzewski K, Ketelaars H A M, Gollash S, Velde G van der, 2002. Geographical patterns in range extension of Ponto-Caspian macroinvertebrate species in Europe. <i>Canadian Journal of Fisheries and Aquatic Sciences</i> . 1159-1174. Jazdzewski K, Konopacka A, Grabowski M, 2005. Native and alien malacostracan Crustacea along the Polish Baltic Sea coast in the 20th century. <i>Oceanological and Hydrobiological Studies</i> . 175-193. Josens G, Vaate A bij de, Usseglio-Polatera P, Cammaerts R, Cherot F, Grisez F, Verboonen P, Bossche J P vanden, 2005. Native and exotic Amphipoda and other Peracarida in the River Meuse: new assemblages emerge from a fast changing fauna. <i>Hydrobiologia</i> . 203-220. Dick JTA, 2009. <i>Dikerogammarus villosus</i> , the amphipod. Available at: <i>Invasive Alien Species in</i> | Very high  |
| 8                                              | 2.05 | Is the taxon currently found in close proximity to, and likely to enter into, the RA area in the near future (e.g. unintentional and intentional introductions)? | Yes<br><br>The species is present in the lower part of the river Adda and it could easily colonise the upper part                                                                                                                                                                                                                                                                                                                                                                                                                                                                                                                                                                                                                                                                                                                                                                                                                                                                                                                                                                                                                                                                                                                                                                                                                                                                                                                                                                                                                                                                                                                                                                                                                                                                                                   | Very high  |
| 3. Invasive elsewhere                          |      |                                                                                                                                                                  |                                                                                                                                                                                                                                                                                                                                                                                                                                                                                                                                                                                                                                                                                                                                                                                                                                                                                                                                                                                                                                                                                                                                                                                                                                                                                                                                                                                                                                                                                                                                                                                                                                                                                                                                                                                                                     |            |
| 9                                              | 3.01 | Has the taxon become naturalised (established viable populations) outside its native range?                                                                      | Yes<br><br><a href="https://www.cabi.org/isc/datasheet/108309#todistribution">https://www.cabi.org/isc/datasheet/108309#todistribution</a>                                                                                                                                                                                                                                                                                                                                                                                                                                                                                                                                                                                                                                                                                                                                                                                                                                                                                                                                                                                                                                                                                                                                                                                                                                                                                                                                                                                                                                                                                                                                                                                                                                                                          | Very high  |
| 10                                             | 3.02 | In the taxon's introduced range, are there known adverse impacts to wild stocks or commercial taxa?                                                              | Yes<br><br><a href="https://www.cabi.org/isc/datasheet/108309#toimpactSummary">https://www.cabi.org/isc/datasheet/108309#toimpactSummary</a>                                                                                                                                                                                                                                                                                                                                                                                                                                                                                                                                                                                                                                                                                                                                                                                                                                                                                                                                                                                                                                                                                                                                                                                                                                                                                                                                                                                                                                                                                                                                                                                                                                                                        | High       |
| 11                                             | 3.03 | In the taxon's introduced range, are there known adverse impacts to aquaculture?                                                                                 | No<br><br><a href="https://www.cabi.org/isc/datasheet/108309#toimpactSummary">https://www.cabi.org/isc/datasheet/108309#toimpactSummary</a>                                                                                                                                                                                                                                                                                                                                                                                                                                                                                                                                                                                                                                                                                                                                                                                                                                                                                                                                                                                                                                                                                                                                                                                                                                                                                                                                                                                                                                                                                                                                                                                                                                                                         | Medium     |
| 12                                             | 3.04 | In the taxon's introduced range, are there known adverse impacts to ecosystem services?                                                                          | Yes<br><br><a href="https://www.cabi.org/isc/datasheet/108309#toimpactSummary">https://www.cabi.org/isc/datasheet/108309#toimpactSummary</a>                                                                                                                                                                                                                                                                                                                                                                                                                                                                                                                                                                                                                                                                                                                                                                                                                                                                                                                                                                                                                                                                                                                                                                                                                                                                                                                                                                                                                                                                                                                                                                                                                                                                        | Medium     |
| 13                                             | 3.05 | In the taxon's introduced range, are there known adverse socio-economic impacts?                                                                                 | Yes<br><br><a href="https://www.cabi.org/isc/datasheet/108309#toimpactSummary">https://www.cabi.org/isc/datasheet/108309#toimpactSummary</a>                                                                                                                                                                                                                                                                                                                                                                                                                                                                                                                                                                                                                                                                                                                                                                                                                                                                                                                                                                                                                                                                                                                                                                                                                                                                                                                                                                                                                                                                                                                                                                                                                                                                        | Medium     |
| B. Biology/Ecology                             |      |                                                                                                                                                                  |                                                                                                                                                                                                                                                                                                                                                                                                                                                                                                                                                                                                                                                                                                                                                                                                                                                                                                                                                                                                                                                                                                                                                                                                                                                                                                                                                                                                                                                                                                                                                                                                                                                                                                                                                                                                                     |            |
| 4. Undesirable (or persistence) traits         |      |                                                                                                                                                                  |                                                                                                                                                                                                                                                                                                                                                                                                                                                                                                                                                                                                                                                                                                                                                                                                                                                                                                                                                                                                                                                                                                                                                                                                                                                                                                                                                                                                                                                                                                                                                                                                                                                                                                                                                                                                                     |            |
| 14                                             | 4.01 | Is it likely that the taxon will be poisonous or pose other risks to human health?                                                                               | No<br><br><a href="https://www.cabi.org/isc/datasheet/108309#toimpactSummary">https://www.cabi.org/isc/datasheet/108309#toimpactSummary</a>                                                                                                                                                                                                                                                                                                                                                                                                                                                                                                                                                                                                                                                                                                                                                                                                                                                                                                                                                                                                                                                                                                                                                                                                                                                                                                                                                                                                                                                                                                                                                                                                                                                                         | Very high  |

|                                 |      |                                                                                                                                                                         |                |                                                                                                                                                                                                                                                                                                                                                                                                                                                                                                                                                                                                                                                                                                                                                                                                                                                                                        |           |
|---------------------------------|------|-------------------------------------------------------------------------------------------------------------------------------------------------------------------------|----------------|----------------------------------------------------------------------------------------------------------------------------------------------------------------------------------------------------------------------------------------------------------------------------------------------------------------------------------------------------------------------------------------------------------------------------------------------------------------------------------------------------------------------------------------------------------------------------------------------------------------------------------------------------------------------------------------------------------------------------------------------------------------------------------------------------------------------------------------------------------------------------------------|-----------|
| 15                              | 4.02 | Is it likely that the taxon will smother one or more native taxa (that are not threatened or protected)?                                                                | Not applicable | not applicable                                                                                                                                                                                                                                                                                                                                                                                                                                                                                                                                                                                                                                                                                                                                                                                                                                                                         | Very high |
| 16                              | 4.03 | Are there any threatened or protected taxa that the non-native taxon would parasitise in the RA area?                                                                   | Yes            | <a href="https://www.cabi.org/isc/datasheet/108309#tobiologyAndEcology">https://www.cabi.org/isc/datasheet/108309#tobiologyAndEcology</a>                                                                                                                                                                                                                                                                                                                                                                                                                                                                                                                                                                                                                                                                                                                                              | High      |
| 17                              | 4.04 | Is the taxon adaptable in terms of climatic and other environmental conditions, thus enhancing its potential persistence if it has invaded or could invade the RA area? | Yes            | <a href="https://www.cabi.org/isc/datasheet/108309">https://www.cabi.org/isc/datasheet/108309</a>                                                                                                                                                                                                                                                                                                                                                                                                                                                                                                                                                                                                                                                                                                                                                                                      | Very high |
| 18                              | 4.05 | Is the taxon likely to disrupt food-web structure/function in aquatic ecosystems if it has invaded or is likely to invade the RA area?                                  | Yes            | <a href="https://www.cabi.org/isc/datasheet/108309">https://www.cabi.org/isc/datasheet/108309</a>                                                                                                                                                                                                                                                                                                                                                                                                                                                                                                                                                                                                                                                                                                                                                                                      | Very high |
| 19                              | 4.06 | Is the taxon likely to exert adverse impacts on ecosystem services in the RA area?                                                                                      | Yes            | <a href="https://www.cabi.org/isc/datasheet/108309">https://www.cabi.org/isc/datasheet/108309</a>                                                                                                                                                                                                                                                                                                                                                                                                                                                                                                                                                                                                                                                                                                                                                                                      | High      |
| 20                              | 4.07 | Is it likely that the taxon will host, and/or act as a vector for, recognised pests and infectious agents that are endemic in the RA area?                              | No             | <a href="https://www.cabi.org/isc/datasheet/108309">https://www.cabi.org/isc/datasheet/108309</a>                                                                                                                                                                                                                                                                                                                                                                                                                                                                                                                                                                                                                                                                                                                                                                                      | High      |
| 21                              | 4.08 | Is it likely that the taxon will host, and/or act as a vector for, recognised pests and infectious agents that are absent from (novel to) the RA area?                  | Yes            | OVCHARENKO, M., BACELA, K., WILKINSON, T., IRONSIDE, J., RIGAUD, T., & WATTIER, R. (2010). <i>Cucumispora dikerogammari</i> n. gen. (Fungi: Microsporidia) infecting the invasive amphipod <i>Dikerogammarus villosus</i> : A potential emerging disease in European rivers. <i>Parasitology</i> , 137(2), 191-204.<br><a href="https://doi.org/10.1017/S0022268909999110">https://doi.org/10.1017/S0022268909999110</a>                                                                                                                                                                                                                                                                                                                                                                                                                                                               | Very high |
| 22                              | 4.09 | Is it likely that the taxon will achieve a body size that will make it more likely to be released from captivity?                                                       | No             | <a href="https://www.cabi.org/isc/datasheet/108309#toidentity">https://www.cabi.org/isc/datasheet/108309#toidentity</a>                                                                                                                                                                                                                                                                                                                                                                                                                                                                                                                                                                                                                                                                                                                                                                | Very high |
| 23                              | 4.10 | Is the taxon capable of sustaining itself in a range of water velocity conditions (e.g. versatile in habitat use)?                                                      | Yes            | <a href="https://www.cabi.org/isc/datasheet/108309">https://www.cabi.org/isc/datasheet/108309</a>                                                                                                                                                                                                                                                                                                                                                                                                                                                                                                                                                                                                                                                                                                                                                                                      | Very high |
| 24                              | 4.11 | Is it likely that the taxon's mode of existence (e.g. excretion of by-products) or behaviours (e.g. feeding) will reduce habitat quality for native taxa?               | No             | <a href="https://www.cabi.org/isc/datasheet/108309#toidentity">https://www.cabi.org/isc/datasheet/108309#toidentity</a>                                                                                                                                                                                                                                                                                                                                                                                                                                                                                                                                                                                                                                                                                                                                                                | Very high |
| 25                              | 4.12 | Is the taxon likely to maintain a viable population even when present in low densities (or persisting in adverse conditions by way of a dormant form)?                  | Yes            | <a href="https://www.cabi.org/isc/datasheet/108309">https://www.cabi.org/isc/datasheet/108309</a>                                                                                                                                                                                                                                                                                                                                                                                                                                                                                                                                                                                                                                                                                                                                                                                      | Very high |
| <b>5. Resource exploitation</b> |      |                                                                                                                                                                         |                |                                                                                                                                                                                                                                                                                                                                                                                                                                                                                                                                                                                                                                                                                                                                                                                                                                                                                        |           |
| 26                              | 5.01 | Is the taxon likely to consume threatened or protected native taxa in the RA area?                                                                                      | Yes            | <a href="https://www.cabi.org/isc/datasheet/108309">https://www.cabi.org/isc/datasheet/108309</a>                                                                                                                                                                                                                                                                                                                                                                                                                                                                                                                                                                                                                                                                                                                                                                                      | Very high |
| 27                              | 5.02 | Is the taxon likely to sequester food resources (including nutrients) to the detriment of native taxa in the RA area?                                                   | Yes            | <a href="https://www.cabi.org/isc/datasheet/108309">https://www.cabi.org/isc/datasheet/108309</a>                                                                                                                                                                                                                                                                                                                                                                                                                                                                                                                                                                                                                                                                                                                                                                                      | High      |
| <b>6. Reproduction</b>          |      |                                                                                                                                                                         |                |                                                                                                                                                                                                                                                                                                                                                                                                                                                                                                                                                                                                                                                                                                                                                                                                                                                                                        |           |
| 28                              | 6.01 | Is the taxon likely to exhibit parental care and/or to reduce age-at-maturity in response to environmental conditions?                                                  | No             | <a href="https://www.cabi.org/isc/datasheet/108309">https://www.cabi.org/isc/datasheet/108309</a>                                                                                                                                                                                                                                                                                                                                                                                                                                                                                                                                                                                                                                                                                                                                                                                      | High      |
| 29                              | 6.02 | Is the taxon likely to produce viable gametes or propagules (in the RA area)?                                                                                           | Yes            | the species is already present in the lower part of the river Adda and in the river Po                                                                                                                                                                                                                                                                                                                                                                                                                                                                                                                                                                                                                                                                                                                                                                                                 | Very high |
| 30                              | 6.03 | Is the taxon likely to hybridise naturally with native taxa?                                                                                                            | No             | <a href="https://www.cabi.org/isc/datasheet/108309#tobiologyAndEcology">https://www.cabi.org/isc/datasheet/108309#tobiologyAndEcology</a>                                                                                                                                                                                                                                                                                                                                                                                                                                                                                                                                                                                                                                                                                                                                              | Very high |
| 31                              | 6.04 | Is the taxon likely to be hermaphroditic or to display asexual reproduction?                                                                                            | No             | <a href="https://www.cabi.org/isc/datasheet/108309#tobiologyAndEcology">https://www.cabi.org/isc/datasheet/108309#tobiologyAndEcology</a>                                                                                                                                                                                                                                                                                                                                                                                                                                                                                                                                                                                                                                                                                                                                              | Very high |
| 32                              | 6.05 | Is the taxon dependent on the presence of another taxon (or specific habitat features) to complete its life cycle?                                                      | No             | <a href="https://www.cabi.org/isc/datasheet/108309">https://www.cabi.org/isc/datasheet/108309</a>                                                                                                                                                                                                                                                                                                                                                                                                                                                                                                                                                                                                                                                                                                                                                                                      | Very high |
| 33                              | 6.06 | Is the taxon known (or likely) to produce a large number of propagules or offspring within a short time span (e.g. < 1 year)?                                           | Yes            | <a href="https://www.cabi.org/isc/datasheet/108309">https://www.cabi.org/isc/datasheet/108309</a>                                                                                                                                                                                                                                                                                                                                                                                                                                                                                                                                                                                                                                                                                                                                                                                      | Very high |
| 34                              | 6.07 | How many time units (days, months, years) does the taxon require to reach the age-at-first-reproduction?                                                                | 4              | months <a href="https://www.cabi.org/isc/datasheet/108309">https://www.cabi.org/isc/datasheet/108309</a>                                                                                                                                                                                                                                                                                                                                                                                                                                                                                                                                                                                                                                                                                                                                                                               | Very high |
| <b>7. Dispersal mechanisms</b>  |      |                                                                                                                                                                         |                |                                                                                                                                                                                                                                                                                                                                                                                                                                                                                                                                                                                                                                                                                                                                                                                                                                                                                        |           |
| 35                              | 7.01 | How many potential internal vectors/pathways could the taxon use to disperse within the RA area (with suitable habitats nearby)?                                        | >1             | <a href="https://www.cabi.org/isc/datasheet/108309">https://www.cabi.org/isc/datasheet/108309</a>                                                                                                                                                                                                                                                                                                                                                                                                                                                                                                                                                                                                                                                                                                                                                                                      | Very high |
| 36                              | 7.02 | Will any of these vectors/pathways bring the taxon in close proximity to one or more protected areas (e.g. MCZ, MPA, SSSI)?                                             | Yes            | It is possible that it colonises wetlands or small tributaries nearby the RA area                                                                                                                                                                                                                                                                                                                                                                                                                                                                                                                                                                                                                                                                                                                                                                                                      | Very high |
| 37                              | 7.03 | Does the taxon have a means of actively attaching itself to hard substrata (e.g. ship hulls, pilings, buoys) such that it enhances the likelihood of dispersal?         | Yes            | Shipping has been identified as the primary vector for accidental introductions of <i>D. villosus</i> over large distances (e.g., Vaate et al., 2002; Jazdzewski and Konopacka, 2002; Dick, 2009). Vaate A bij de; Jazdzewski K; Ketelaars HAM; Gollash S; Velde G van der, 2002. Geographical patterns in range extension of Ponto-Caspian macroinvertebrate species in Europe. <i>Canadian Journal of Fisheries and Aquatic Sciences</i> , 59:1159-1174. Jazdzewski K; Konopacka A; Grabowski M, 2005. Native and alien malacostracan Crustacea along the Polish Baltic Sea coast in the 20th century. <i>Oceanological and Hydrobiological Studies</i> , 34:175-193. Dick JTA, 2009. <i>Dikerogammarus villosus</i> , the amphipod. Available at: <a href="http://www.habitas.org.uk/invasive/species.asp?item=50005">http://www.habitas.org.uk/invasive/species.asp?item=50005</a> | High      |

|                                |      |                                                                                                                                                                                           |           |                                                                                                                                                                                                                                                                                                                                                                                                                                     |           |
|--------------------------------|------|-------------------------------------------------------------------------------------------------------------------------------------------------------------------------------------------|-----------|-------------------------------------------------------------------------------------------------------------------------------------------------------------------------------------------------------------------------------------------------------------------------------------------------------------------------------------------------------------------------------------------------------------------------------------|-----------|
| 38                             | 7.04 | Is natural dispersal of the taxon likely to occur as eggs (for animals) or as propagules (for plants: seeds, spores) in the RA area?                                                      | No        | <a href="https://www.cabi.org/isc/datasheet/108309#tobiologyAndEcology">https://www.cabi.org/isc/datasheet/108309#tobiologyAndEcology</a>                                                                                                                                                                                                                                                                                           | Very high |
| 39                             | 7.05 | Is natural dispersal of the taxon likely to occur as larvae/juveniles (for animals) or as fragments/seedlings (for plants) in the RA area?                                                | No        | <a href="https://www.cabi.org/isc/datasheet/108309">https://www.cabi.org/isc/datasheet/108309</a>                                                                                                                                                                                                                                                                                                                                   | High      |
| 40                             | 7.06 | Are older life stages of the taxon likely to migrate in the RA area for reproduction?                                                                                                     | Yes       | <a href="https://www.cabi.org/isc/datasheet/108309">https://www.cabi.org/isc/datasheet/108309</a>                                                                                                                                                                                                                                                                                                                                   | Very high |
| 41                             | 7.07 | Are propagules or eggs of the taxon likely to be dispersed in the RA area by other animals?                                                                                               | Yes       | <a href="https://www.cabi.org/isc/datasheet/108309">https://www.cabi.org/isc/datasheet/108309</a>                                                                                                                                                                                                                                                                                                                                   | Medium    |
| 42                             | 7.08 | Is dispersal of the taxon along any of the vectors/pathways mentioned in the previous seven questions (35–41; i.e. either unintentional or intentional) likely to be considered?          | Yes       | <a href="https://www.cabi.org/isc/datasheet/108309">https://www.cabi.org/isc/datasheet/108309</a>                                                                                                                                                                                                                                                                                                                                   | Very high |
| 43                             | 7.09 | Is dispersal of the taxon density dependent?                                                                                                                                              | No        | <a href="https://www.cabi.org/isc/datasheet/108309#tobiologyAndEcology">https://www.cabi.org/isc/datasheet/108309#tobiologyAndEcology</a>                                                                                                                                                                                                                                                                                           | High      |
| <b>8. Tolerance attributes</b> |      |                                                                                                                                                                                           |           |                                                                                                                                                                                                                                                                                                                                                                                                                                     |           |
| 44                             | 8.01 | Is the taxon able to withstand being out of water for extended periods (e.g. minimum of one or more hours) at some stage of its life cycle?                                               | Yes       | the species can survive out of the water 32. Bacela-Spychalska, K.; Grabowski, M.; Rewicz, T.; Konopacka, A.; Wattier, R. The 'killer shrimp' Dikerogammarus villosus (Crustacea, Amphipoda) invading Alpine lakes: overland transport by recreational boats and scuba-diving gear as potential entry vectors?. Aquat Conserv 2013, 23(4), 606-618. <a href="https://doi.org/10.1002/aqc.2329">https://doi.org/10.1002/aqc.2329</a> | Medium    |
| 45                             | 8.02 | Is the taxon tolerant of a wide range of water quality conditions relevant to that taxon? [In the Justification field, indicate the relevant water quality variable(s) being considered.] | No        | <a href="https://www.cabi.org/isc/datasheet/108309">https://www.cabi.org/isc/datasheet/108309</a>                                                                                                                                                                                                                                                                                                                                   | Very high |
| 46                             | 8.03 | Can the taxon be controlled or eradicated in the wild with chemical, biological, or other agents/means?                                                                                   | No        | <a href="https://www.cabi.org/isc/datasheet/108309">https://www.cabi.org/isc/datasheet/108309</a>                                                                                                                                                                                                                                                                                                                                   | Very high |
| 47                             | 8.04 | Is the taxon likely to tolerate or benefit from environmental/human disturbance?                                                                                                          | Yes       | <a href="https://www.cabi.org/isc/datasheet/108309">https://www.cabi.org/isc/datasheet/108309</a>                                                                                                                                                                                                                                                                                                                                   | Very high |
| 48                             | 8.05 | Is the taxon able to tolerate salinity levels that are higher or lower than those found in its usual environment?                                                                         | Yes       | <a href="https://www.cabi.org/isc/datasheet/108309">https://www.cabi.org/isc/datasheet/108309</a>                                                                                                                                                                                                                                                                                                                                   | Very high |
| 49                             | 8.06 | Are there effective natural enemies (predators) of the taxon present in the RA area?                                                                                                      | Yes       | potentially there are predators of this species like fish. <a href="https://www.cabi.org/isc/datasheet/108309#tonaturalEnemies">https://www.cabi.org/isc/datasheet/108309#tonaturalEnemies</a>                                                                                                                                                                                                                                      | High      |
| <b>C. Climate change</b>       |      |                                                                                                                                                                                           |           |                                                                                                                                                                                                                                                                                                                                                                                                                                     |           |
| <b>9. Climate change</b>       |      |                                                                                                                                                                                           |           |                                                                                                                                                                                                                                                                                                                                                                                                                                     |           |
| 50                             | 9.01 | Under the predicted future climatic conditions, are the risks of entry into the RA area posed by the taxon likely to increase, decrease or not change?                                    | No change | expert judgement                                                                                                                                                                                                                                                                                                                                                                                                                    | Medium    |
| 51                             | 9.02 | Under the predicted future climatic conditions, are the risks of establishment posed by the taxon likely to increase, decrease or not change?                                             | No change | expert judgement                                                                                                                                                                                                                                                                                                                                                                                                                    | Medium    |
| 52                             | 9.03 | Under the predicted future climatic conditions, are the risks of dispersal within the RA area posed by the taxon likely to increase, decrease or not change?                              | No change | expert judgement                                                                                                                                                                                                                                                                                                                                                                                                                    | Medium    |
| 53                             | 9.04 | Under the predicted future climatic conditions, what is the likely magnitude of future potential impacts on biodiversity and/or ecological integrity/status?                              | Higher    | expert judgement                                                                                                                                                                                                                                                                                                                                                                                                                    | High      |
| 54                             | 9.05 | Under the predicted future climatic conditions, what is the likely magnitude of future potential impacts on ecosystem structure and/or function?                                          | No change | expert judgement                                                                                                                                                                                                                                                                                                                                                                                                                    | Medium    |
| 55                             | 9.06 | Under the predicted future climatic conditions, what is the likely magnitude of future potential impacts on ecosystem services/social-economic factors?                                   | Higher    | expert judgement                                                                                                                                                                                                                                                                                                                                                                                                                    | High      |

| Statistics                                     |             |
|------------------------------------------------|-------------|
| Scores                                         |             |
| <b>BRA</b>                                     | <b>40.0</b> |
| <b>BRA Outcome</b>                             | <b>High</b> |
| <b>BRA+CCA</b>                                 | <b>44.0</b> |
| <b>BRA+CCA Outcome</b>                         | <b>High</b> |
| Score partition                                |             |
| <b>A. Biogeography/Historical</b>              | <b>17.0</b> |
| 1. Domestication/Cultivation                   | 0.0         |
| 2. Climate, distribution and introduction risk | 3.0         |
| 3. Invasive elsewhere                          | 14.0        |
| <b>B. Biology/Ecology</b>                      | <b>23.0</b> |
| 4. Undesirable (or persistence) traits         | 7.0         |
| 5. Resource exploitation                       | 7.0         |
| 6. Reproduction                                | 0.0         |
| 7. Dispersal mechanisms                        | 4.0         |
| 8. Tolerance attributes                        | 5.0         |
| <b>C. Climate change</b>                       | <b>4.0</b>  |
| 9. Climate change                              | 4.0         |

| Answered Questions                             |           |
|------------------------------------------------|-----------|
| <b>Total</b>                                   | <b>55</b> |
| <b>A. Biogeography/Historical</b>              | <b>13</b> |
| 1. Domestication/Cultivation                   | 3         |
| 2. Climate, distribution and introduction risk | 5         |
| 3. Invasive elsewhere                          | 5         |
| <b>B. Biology/Ecology</b>                      | <b>36</b> |
| 4. Undesirable (or persistence) traits         | 12        |
| 5. Resource exploitation                       | 2         |
| 6. Reproduction                                | 7         |
| 7. Dispersal mechanisms                        | 9         |
| 8. Tolerance attributes                        | 6         |
| <b>C. Climate change</b>                       | <b>6</b>  |
| 9. Climate change                              | 6         |
| Sectors affected                               |           |
| <b>Commercial</b>                              | <b>14</b> |
| <b>Environmental</b>                           | <b>14</b> |
| <b>Species or population nuisance traits</b>   | <b>22</b> |

| Thresholds     |              |
|----------------|--------------|
| <b>BRA</b>     | <b>13.25</b> |
| <b>BRA+CCA</b> | <b>13.25</b> |
| Confidence     |              |
| <b>BRA+CCA</b> | <b>0.85</b>  |
| <b>BRA</b>     | <b>0.88</b>  |
| <b>CCA</b>     | <b>0.58</b>  |

| Date and Time |                            |
|---------------|----------------------------|
|               | <b>14/09/2022 22:30:20</b> |
